# Supplementary material for: High-temperature failure behaviour and mechanism of K-based additives in Li–Mg–N–H hydrogen storage systems
Source: Royal Society of Chemistry journal article supplement (doi:10.1039/c4ta00025k), 2014-01-01
Supplement: c4ta00025k1.pdf [file c4ta00025k1.pdf]

## Electronic Supplementary Information

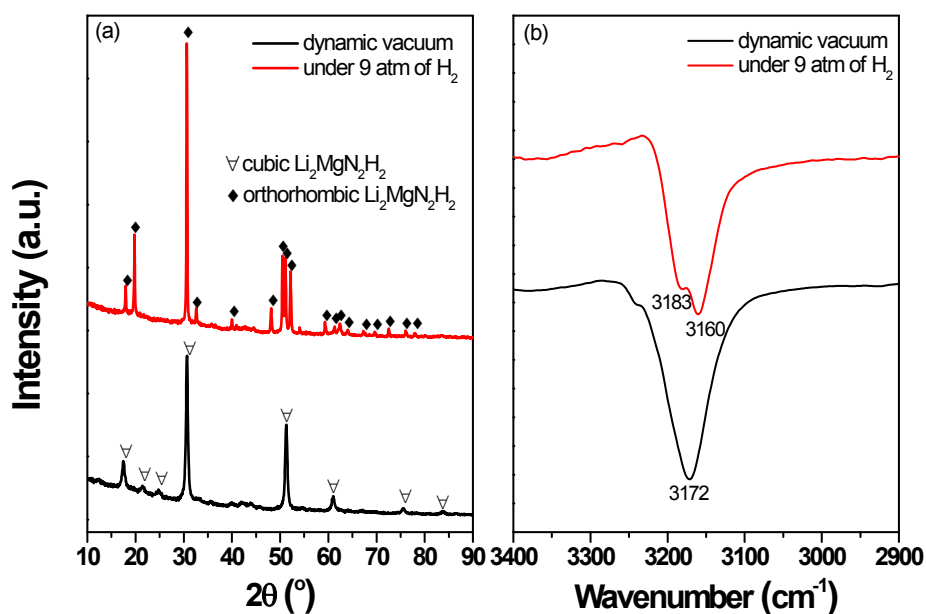

Fig. S1 XRD patterns (a) and FTIR spectra (b) of the dehydrogenated  $Mg(NH_2)_2-2LiH$  under different conditions.

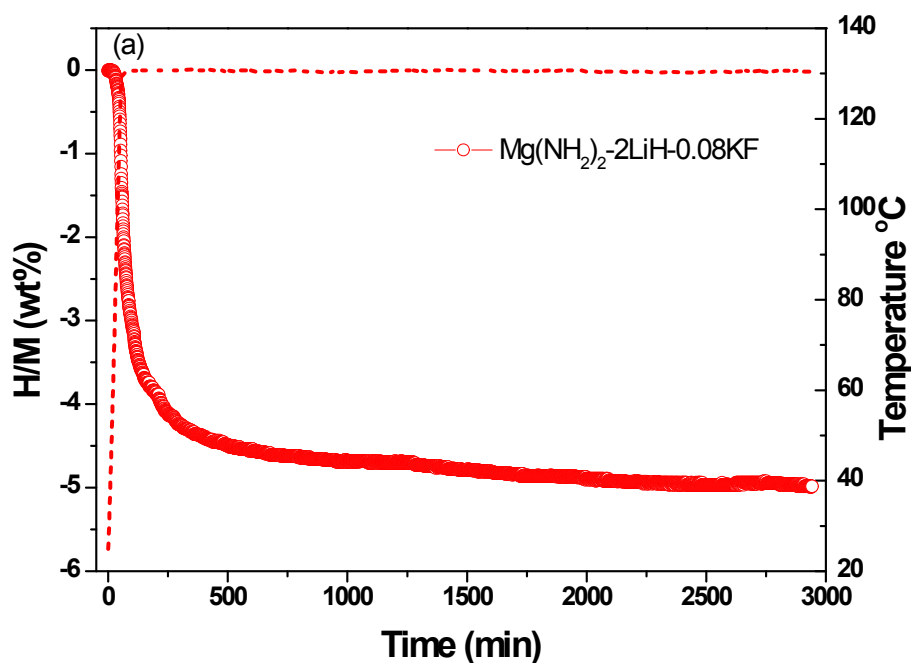

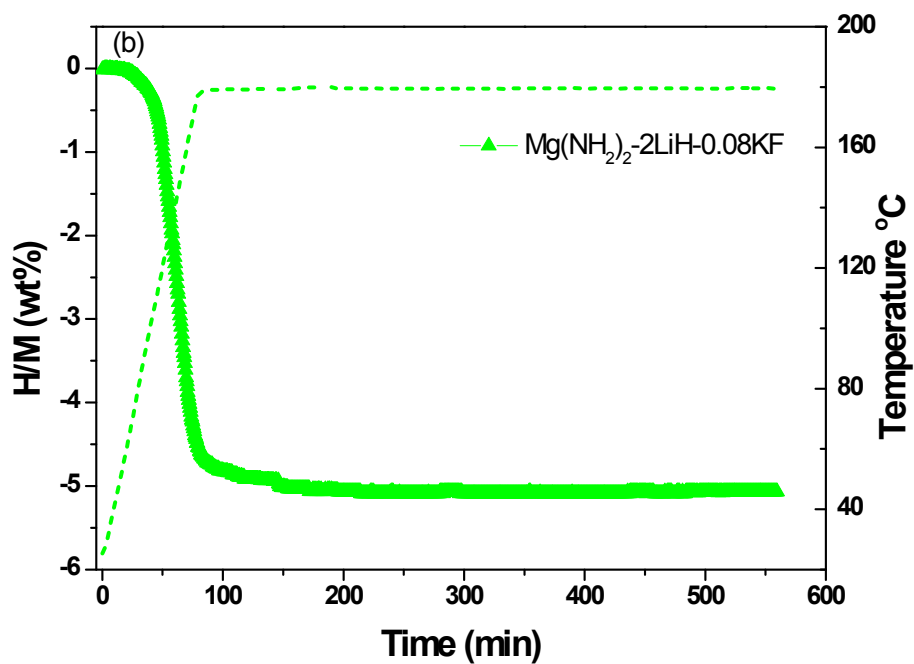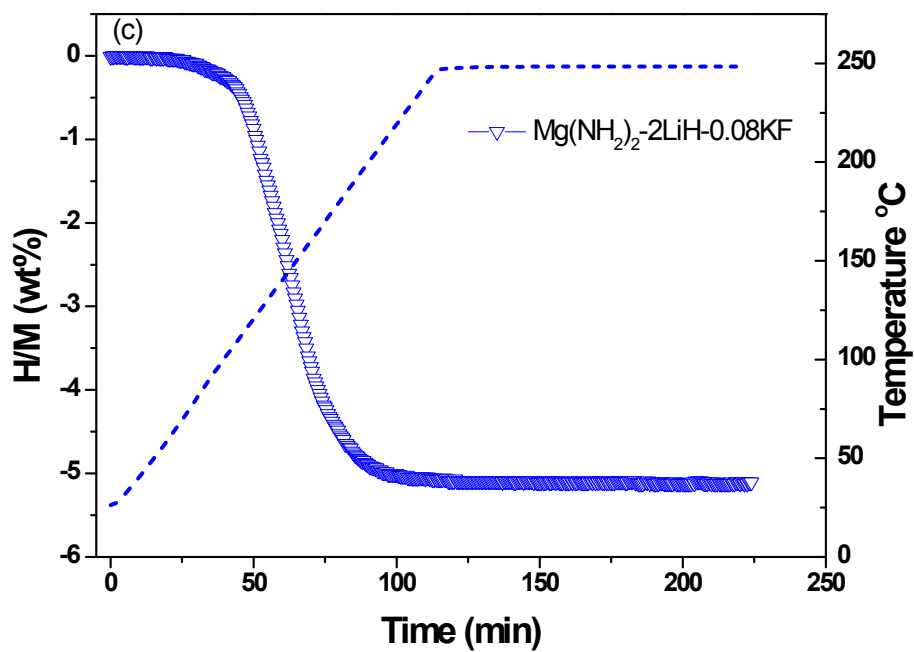

Fig. S2 Dehydrogenation curves of the  $\text{Mg}(\text{NH}_2)_2\text{-}2\text{LiH}\text{-}0.08\text{KF}$  samples as a function of time and temperature.

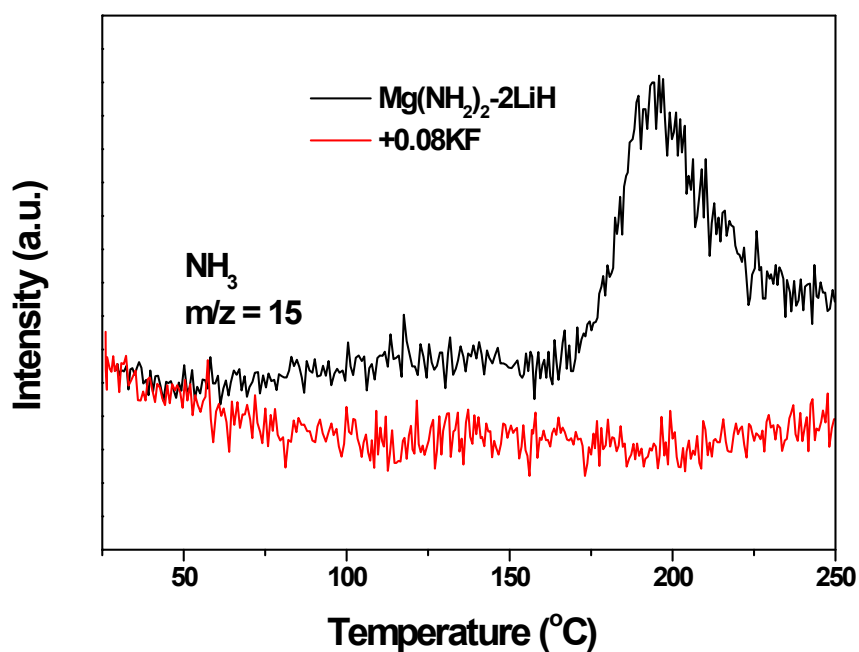

Fig. S3 MS- $\text{NH}_3$  of the  $\text{Mg}(\text{NH}_2)_2\text{-2LiH}$  and  $\text{Mg}(\text{NH}_2)_2\text{-2LiH-0.08KF}$  samples.

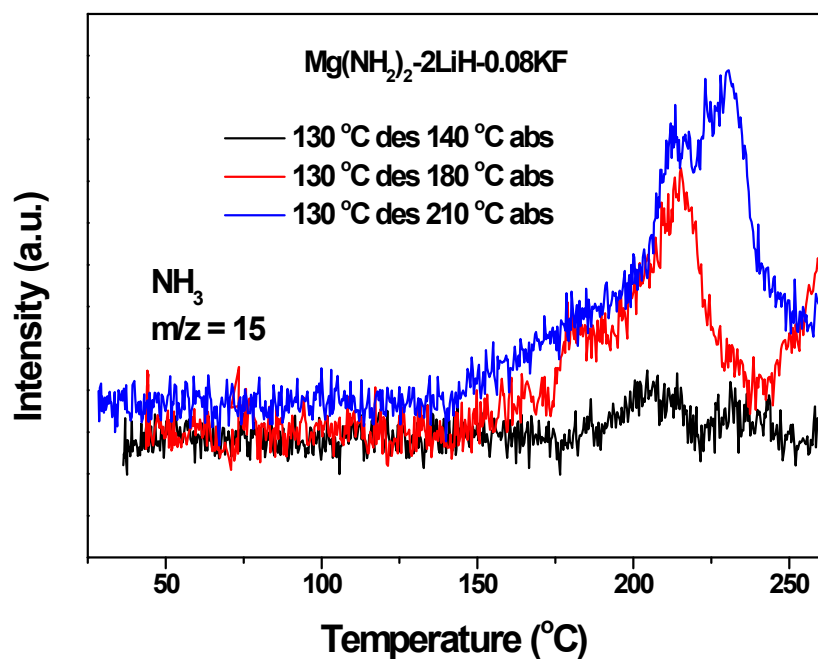

Fig. S4 MS- $\text{NH}_3$  of the  $\text{Mg}(\text{NH}_2)_2\text{-2LiH-0.08KF}$  samples with different treatments.

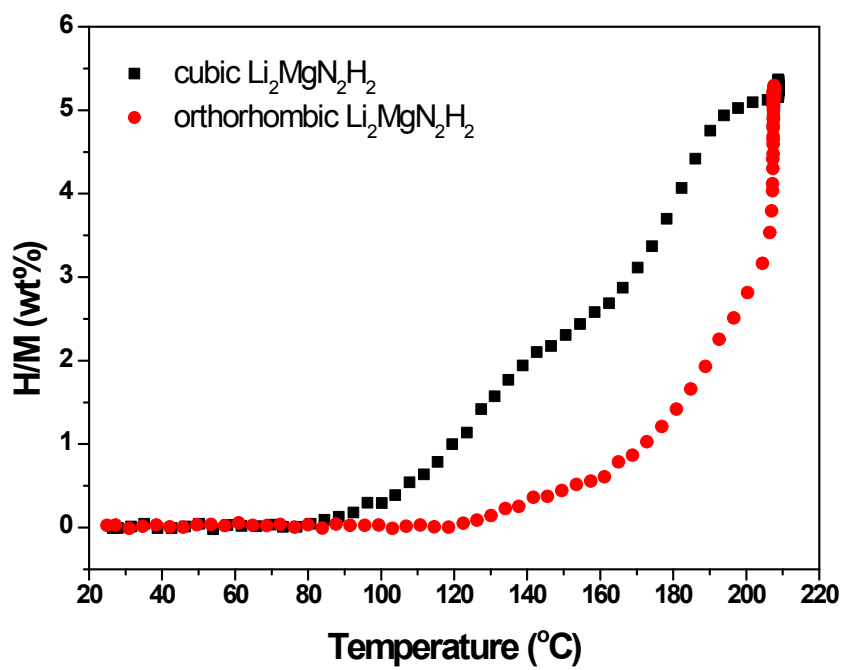

Fig. S5 Hydrogenation curves of the cubic and orthorhombic Li<sub>2</sub>MgN<sub>2</sub>H<sub>2</sub>.

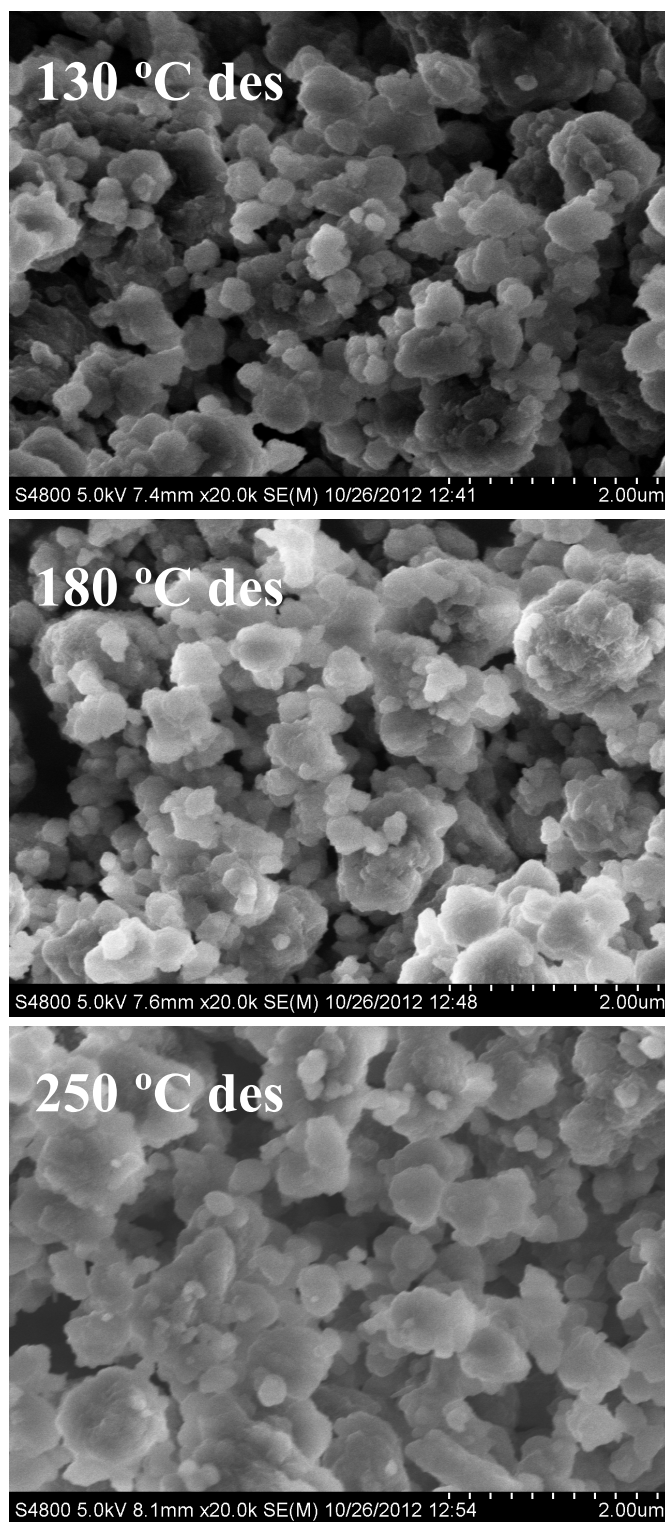

Fig. S6 SEM images of the Mg(NH<sub>2</sub>)<sub>2</sub>-2LiH-0.08KF samples dehydrogenated at different temperatures.

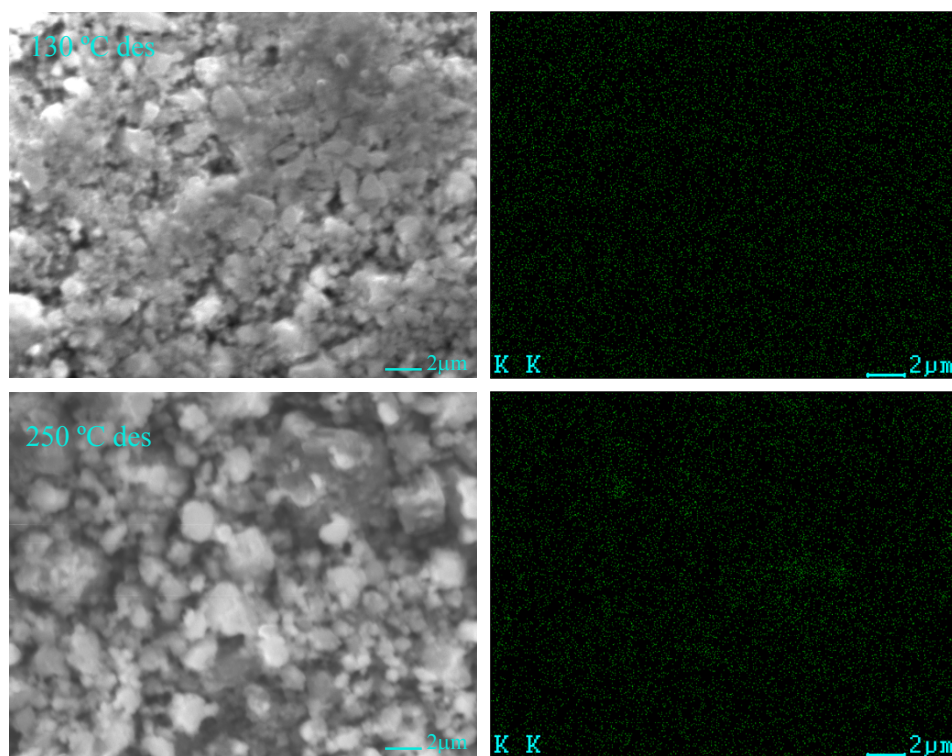

Fig. S7 SEM images and EDS mapping of K for the  $\text{Mg}(\text{NH}_2)_2\text{-}2\text{LiH}\text{-}0.08\text{KF}$  samples dehydrogenated at 130 and 250 °C.

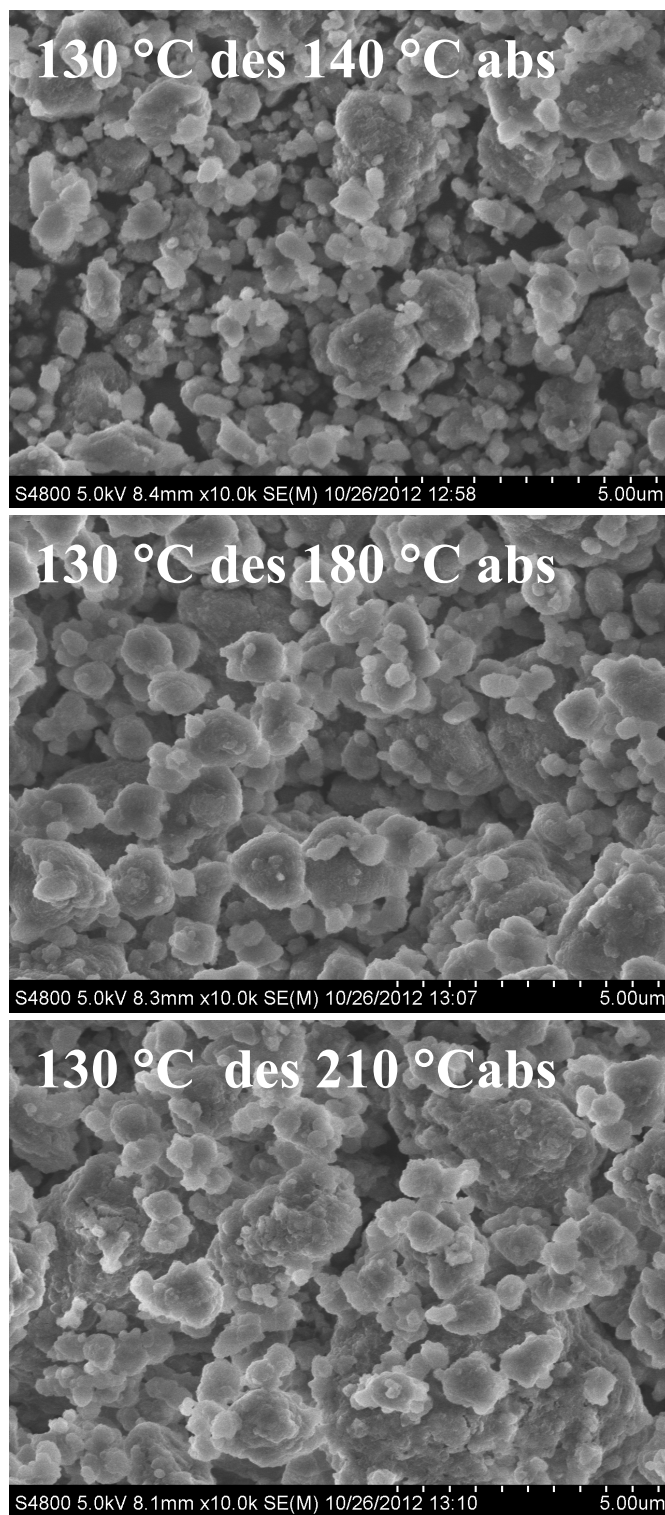

Fig. S8 SEM images of  $\text{Mg}(\text{NH}_2)_2\text{-}2\text{LiH}\text{-}0.08\text{KF}$  hydrogenated at different temperatures.

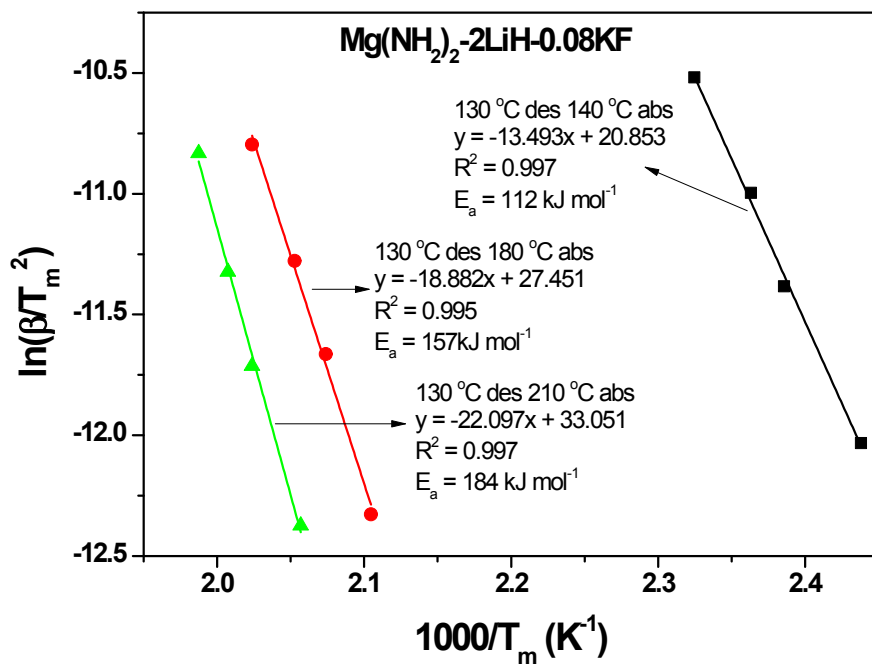

Fig. S9 Kissinger's plots of the Mg(NH<sub>2</sub>)<sub>2</sub>-2LiH-0.08KF samples.

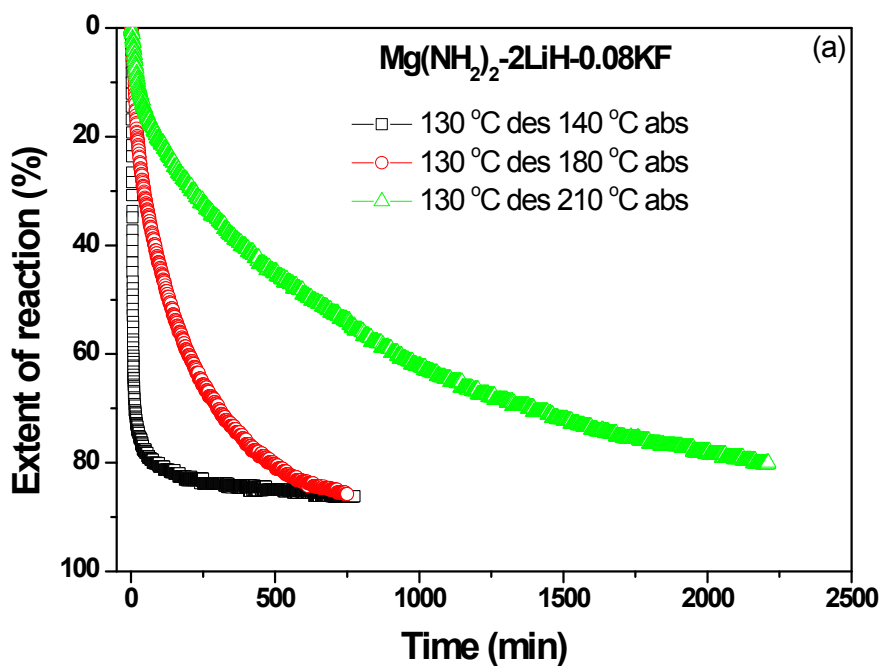



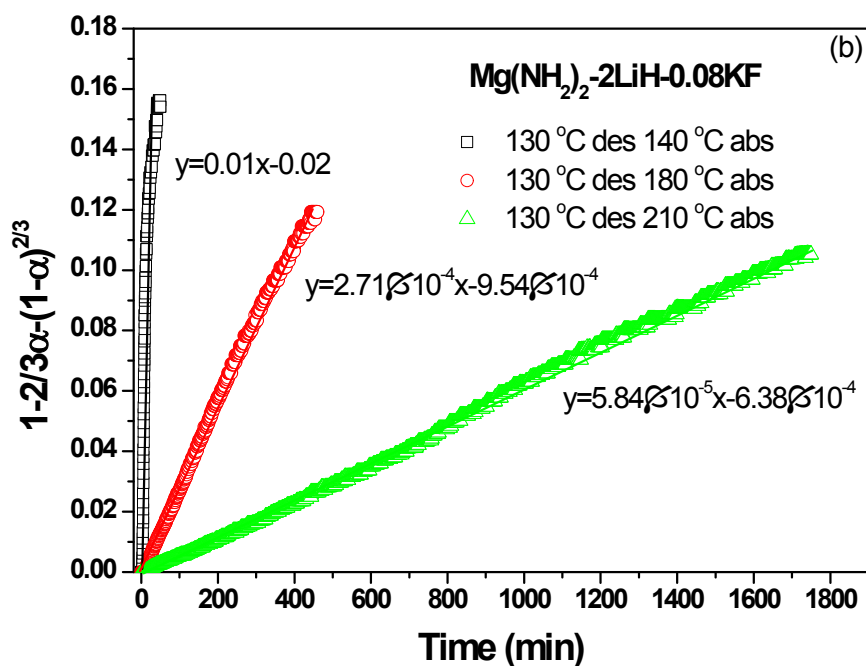

Fig. S10 Isothermal dehydrogenation curves (a) and the corresponding Ginstling-Brounshtein's plots (b) of the Mg(NH<sub>2</sub>)<sub>2</sub>-2LiH-0.08KF samples.

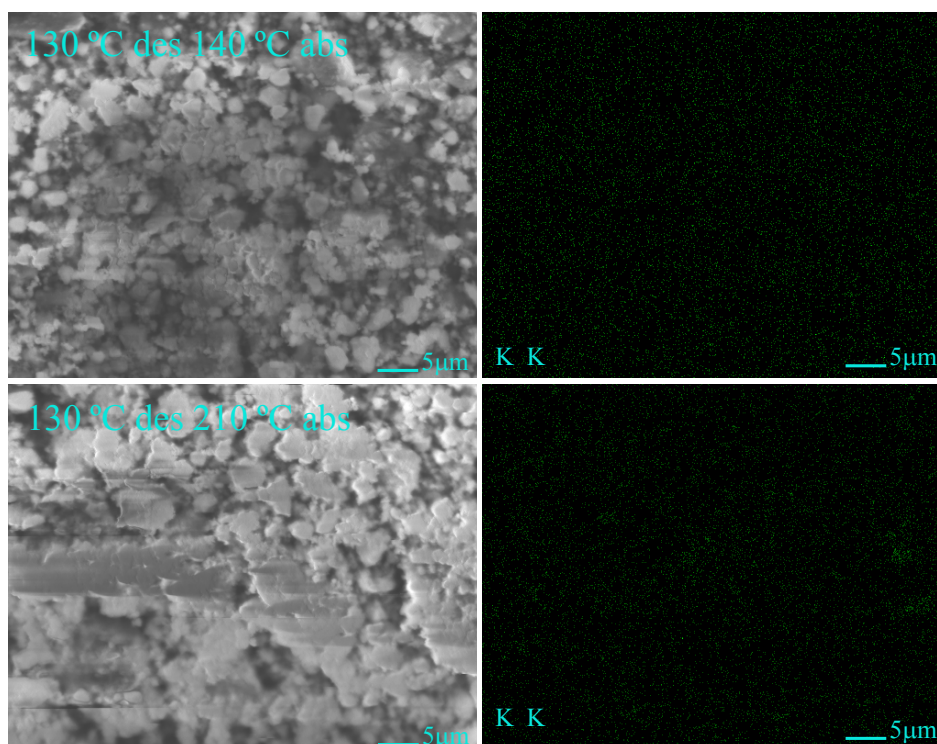

Fig. S11 SEM images and EDS mapping of K for the Mg(NH<sub>2</sub>)<sub>2</sub>-2LiH-0.08KF samples hydrogenated at 140 and 210 °C.

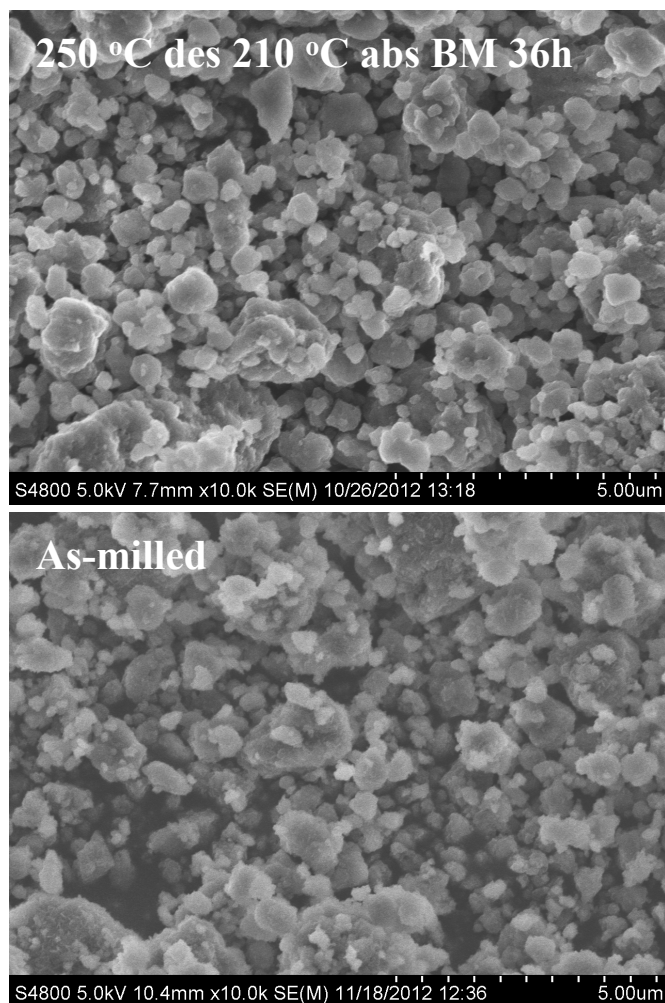

Fig. S12 SEM images of the post-milled  $\text{Mg}(\text{NH}_2)_2\text{-}2\text{LiH}\text{-}0.08\text{KF}$  samples before and after cycling.
